# Supplementary material for: Hemispheric differences in ozone across the stratosphere-troposphere exchange region
Source: Copernicus journal article supplement (doi:10.5194/egusphere-2024-3719), 2024-12-13
Supplement: Supplementary file 1 [file egusphere-2024-3719-supplement.pdf]

*Supplement of*

## **Hemispheric differences in ozone across the stratosphere-troposphere exchange region**

Rodrigo J. Seguel et al.

*Correspondence to:* Rodrigo J. Seguel (rodrigoseguel@uchile.cl)

### **List of contents**

**Figure S1:** Routes position frequency obtained from aircraft GPSs. All panels show only SouthTRAC and IAGOS data within the same latitudinal band 45°-60° in the SH and NH. The upper panel shows the number of GPS observations by grid cell (5° x 5°) between 300 and 700 hPa. The lower panels show the same information between 700 and 300 hPa.

**Figure S2:** Ozone box plot ( $\text{nmol mol}^{-1}$ ) and associated observation numbers by pressure bins. The plots include ozone data with RH lower than 30%. In the upper panel, the left, middle and right plots show the entire period, late winter-early spring and mid-spring for the northern and southern hemispheres and high-depleted and low-depleted years. Box plots indicate the median, the 25th and 75th percentiles. The whiskers extend to the 5th and 95th percentiles. In the lower panels, the X-axis shows the observation numbers. The rest of the plot information is the same as described in the upper panel. High-depletion years in SH are based on ozonesondes launched from Ushuaia.

**Figure S3:** Ozone box plot ( $\text{nmol mol}^{-1}$ ) and associated observation numbers by pressure bins. The plots include ozone data with RH lower than 10%. In the upper panel, the left, middle and right plots show the entire period, late winter-early spring and mid-spring for the northern and southern hemispheres and high-depleted and low-depleted years. Box plots indicate the median, the 25th and 75th percentiles. The whiskers extend to the 5th and 95th percentiles. In the lower panels, the X-axis shows the observation numbers. The rest of the plot information is the same as described in the upper panel. High-depletion years in SH are based on ozonesondes launched from Ushuaia.

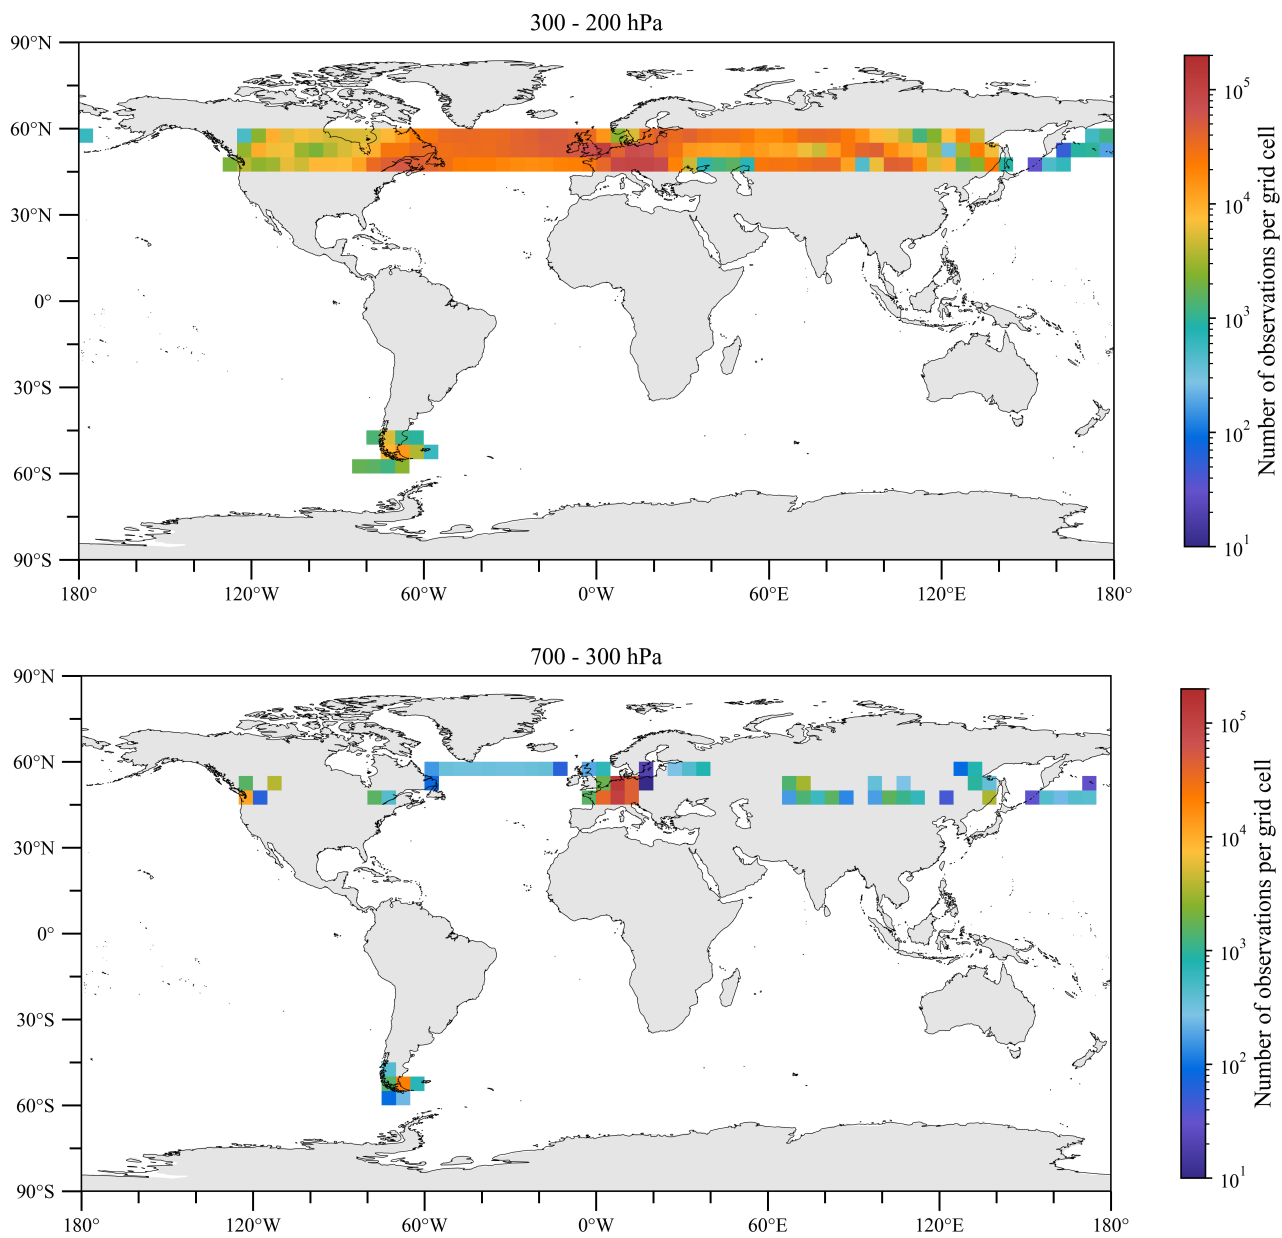

**Figure S1: Routes position frequency obtained from aircraft GPSs. All panels show only SouthTRAC and IAGOS data within the same latitudinal band 45°-60° in the SH and NH. The upper panel shows the number of GPS observations by grid cell (5° x 5°) between 200 and 300 hPa. The lower panels show the same information between 300 and 700 hPa.**

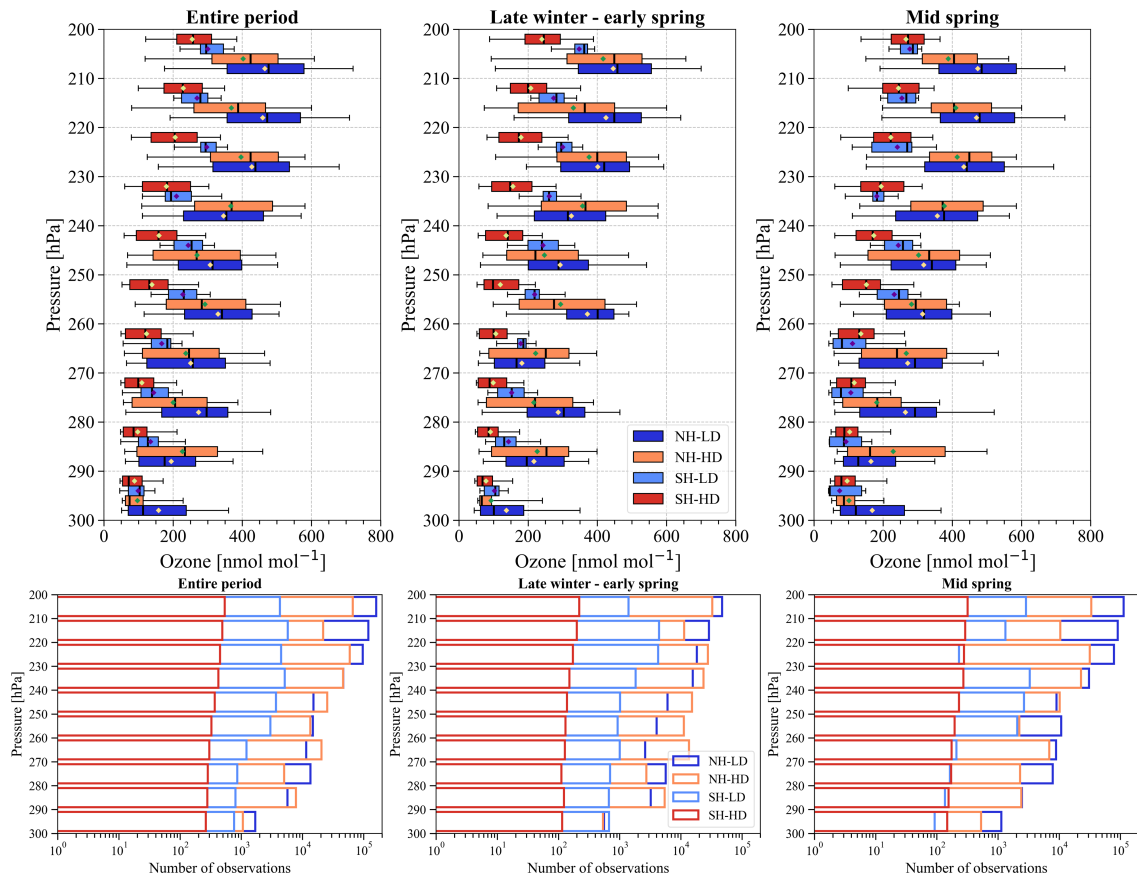

**Figure S2: Ozone box plot ( $\text{nmol mol}^{-1}$ ) and associated observation numbers by pressure bins. The plots include ozone data with RH lower than 30%. In the upper panel, the left, middle and right plots show the entire period, late winter-early spring and mid-spring for the northern and southern hemispheres and high-depleted and low-depleted years. Box plots indicate the median, the 25th and 75th percentiles. The whiskers extend to the 5th and 95th percentiles. In the lower panels, the X-axis shows the observation numbers. The rest of the plot information is the same as described in the upper panel. High-depletion years in SH are based on ozonesondes launched from Ushuaia.**

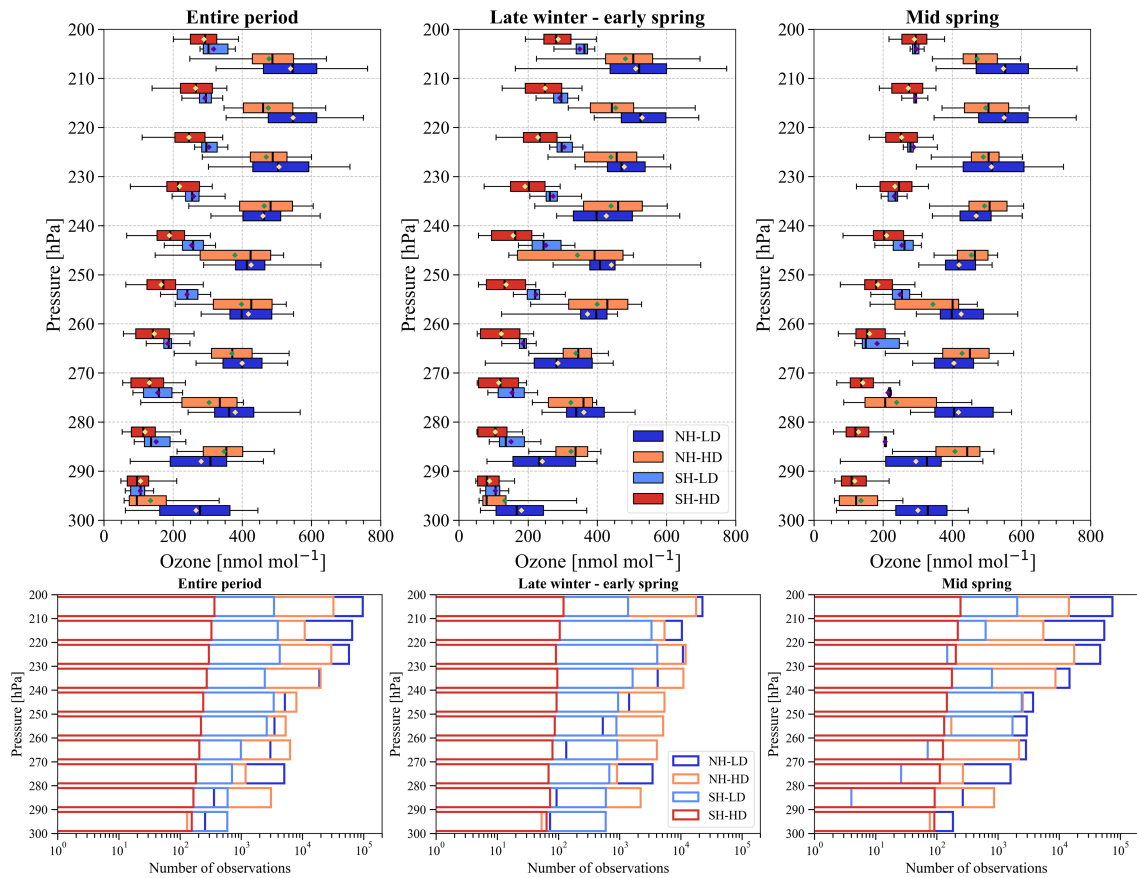

**Figure S3: Ozone box plot ( $\text{nmol mol}^{-1}$ ) and associated observation numbers by pressure bins. The plots include ozone data with RH lower than 10%. In the upper panel, the left, middle and right plots show the entire period, late winter-early spring and mid-spring for the northern and southern hemispheres and high-depleted and low-depleted years. Box plots indicate the median, the 25th and 75th percentiles. The whiskers extend to the 5th and 95th percentiles. In the lower panels, the X-axis shows the observation numbers. The rest of the plot information is the same as described in the upper panel. High-depletion years in SH are based on ozonesondes launched from Ushuaia.**
